# Supplementary material for: Cancer symptom awareness and barriers to symptomatic presentation in England—are we clear on cancer?
Source: PubMed Central journal article supplement — Br J Cancer. 2015 Jun 30;113(3):533–42. doi: 10.1038/bjc.2015.164 (PMC4522620; doi:10.1038/bjc.2015.164), 2015-06-30
Supplement: bjc2015164x1.pdf [file bjc2015164x1.pdf]

## Appendices

### Appendix 1: Methodological overview of the sample, sampling frame and data collection methods

|                        | Cancer Network (area)         | n (%)        | Sampling frame                                                                     | Data collection method           |
|------------------------|-------------------------------|--------------|------------------------------------------------------------------------------------|----------------------------------|
| Random probability     | Central South Coast           | 1,601 (3.0)  | UK phonebook                                                                       | Telephone interviews             |
|                        | North Trent                   | 5,835 (12.0) |                                                                                    |                                  |
|                        | Merseyside & Cheshire         | 389 (0.8)    | UK Electoral roll                                                                  |                                  |
|                        | Mount Vernon                  | 1,251 (2.5)  | Royal Mail postcodes                                                               | Face-to-face, in-home interviews |
|                        | South East London             | 2,298 (4.6)  |                                                                                    |                                  |
|                        | North East London             | 3,212 (6.5)  |                                                                                    |                                  |
|                        | South West London             | 5,009 (10.0) |                                                                                    |                                  |
|                        | Greater Manchester & Cheshire | 1,490 (3.0)  |                                                                                    |                                  |
| [Subtotal random       | 21,085 (43.0)]                |              |                                                                                    |                                  |
| Non-random probability | Anglia                        | 3,776 (7.7)  | No formal sampling frame (people approached on the street & knocking door-to-door) | Face-to-face, in-home interviews |
|                        | Arden                         | 990 (2.0)    |                                                                                    |                                  |
|                        | East Midlands                 | 2,030 (4.0)  |                                                                                    |                                  |
|                        | Sussex                        | 3,001 (6.0)  |                                                                                    |                                  |
|                        | North of England              | 2,030 (4.0)  |                                                                                    |                                  |
|                        | Humber & Yorkshire            | 5,664 (11.5) |                                                                                    |                                  |
|                        | Kent & Medway                 | 3,412 (7.0)  |                                                                                    |                                  |
|                        | North London                  | 3,943 (8.0)  | Face-to-face interviews                                                            |                                  |
|                        | Yorkshire                     | 2,396 (5.0)  |                                                                                    |                                  |
|                        | Three Counties                | 943 (2.0)    |                                                                                    |                                  |
| [Subtotal non-random   | 28,185 (57.0)]                |              |                                                                                    |                                  |
| Total                  | 49,270 (100.0)                |              |                                                                                    |                                  |
