# Supplementary material for: Cancer symptom awareness and barriers to symptomatic presentation in England—are we clear on cancer?
Source: PubMed Central journal article supplement — Br J Cancer. 2015 Jun 30;113(3):533–42. doi: 10.1038/bjc.2015.164 (PMC4522620; doi:10.1038/bjc.2015.164), 2015-06-30
Supplement: bjc2015164x2.pdf [file bjc2015164x2.pdf]

**Appendix 2: Geographical distribution of participants and completeness of socio-demographic data in the full sample (n=49,270), according to cancer networks area and the Primary Care Trust (PCT) of residence.**

| <b>Cancer Network</b>                  | <b>n</b> | <b>with demographic data* (%)</b> | <b>PCT of residence</b>             | <b>n</b> | <b>with demographic data* (%)</b> |
|----------------------------------------|----------|-----------------------------------|-------------------------------------|----------|-----------------------------------|
| <b>Anglia</b>                          | 3,542    | 3,427 (96.7)                      | Bedfordshire (5P2)                  | 682      | 645 (94.6)                        |
|                                        |          |                                   | Cambridgeshire (5PP)                | 679      | 653 (96.2)                        |
|                                        |          |                                   | Great Yarmouth and Waveney (5PR)    | 519      | 495 (95.4)                        |
|                                        |          |                                   | Norfolk (5PQ)                       | 501      | 484 (96.6)                        |
|                                        |          |                                   | Peterborough (5PN)                  | 537      | 533 (99.3)                        |
|                                        |          |                                   | Suffolk (5PT)                       | 624      | 617 (98.9)                        |
| <b>Arden</b>                           | 473      | 371 (78.4)                        | Coventry Teaching (5MD)             | 149      | 123 (82.6)                        |
|                                        |          |                                   | Warwickshire (5PM)                  | 324      | 248 (76.5)                        |
| <b>Central South Coast</b>             | 1,467    | 1,450 (98.8)                      | Hampshire (5QC)                     | 396      | 387 (97.7)                        |
|                                        |          |                                   | Isle of Wight NHS (5QT)             | 379      | 378 (99.7)                        |
|                                        |          |                                   | Portsmouth City Teaching (5FE)      | 344      | 342 (99.4)                        |
|                                        |          |                                   | Southampton City (5L1)              | 348      | 343 (98.6)                        |
| <b>Greater Manchester and Cheshire</b> | 1,491    | 466 (31.2)                        | Ashton, Leigh and Wigan (5HG)       | 104      | 43 (41.3)                         |
|                                        |          |                                   | Bolton (5HQ)                        | 124      | 36 (29.0)                         |
|                                        |          |                                   | Bury (5JX)                          | 103      | 30 (29.1)                         |
|                                        |          |                                   | Central & Eastern Cheshire (5NP)    | 112      | 40 (35.7)                         |
|                                        |          |                                   | Heywood, Middleton & Rochdale (5NQ) | 104      | 31 (29.8)                         |
|                                        |          |                                   | Manchester (5NT)                    | 173      | 35 (20.2)                         |
|                                        |          |                                   | Oldham (5J5)                        | 107      | 29 (27.1)                         |
|                                        |          |                                   | Salford (5F5)                       | 328      | 108 (32.9)                        |
|                                        |          |                                   | Stockport (5F7)                     | 103      | 37 (35.9)                         |
|                                        |          |                                   | Tameside and Glossop (5LH)          | 126      | 38 (30.2)                         |
|                                        |          |                                   | Trafford (5NR)                      | 107      | 39 (36.4)                         |
| <b>East Midlands</b>                   | 1,946    | 1,842 (94.7)                      | Northamptonshire Teaching (5PD)     | 1,946    | 1,842 (94.7)                      |
| <b>Humber and Yorkshire Coast</b>      | 4,303    | 4,022 (93.5)                      | East Riding (5NW)                   | 1,225    | 1,169 (95.4)                      |
|                                        |          |                                   | Hull Teaching (5NX)                 | 953      | 907 (95.2)                        |
|                                        |          |                                   | North East Lincolnshire (TAN)       | 1,026    | 936 (91.2)                        |
|                                        |          |                                   | North Lincolnshire (5EF)            | 1,099    | 1,010 (91.9)                      |
| <b>Kent and Medway</b>                 | 3,067    | 2,767 (90.2)                      | Eastern & Coastal Kent (5QA)        | 1,119    | 1,033 (92.3)                      |
|                                        |          |                                   | Medway (5L3)                        | 1,076    | 994 (92.4)                        |
|                                        |          |                                   | West Kent (5P9)                     | 872      | 740 (84.9)                        |
| <b>Mount Vernon</b>                    | 1,207    | 1,146 (95.0)                      | Hertfordshire (5QV)                 | 810      | 774 (95.6)                        |
|                                        |          |                                   | Luton Teaching (5GC)                | 397      | 372 (93.7)                        |
| <b>Merseyside &amp; Cheshire</b>       | 389      | 0 (00.0)                          | Missing geographic data             | 389      | 0 (00.0)                          |
| <b>North East London</b>               | 2,996    | 2,601 (86.8)                      | Barking & Dagenham (5C2)            | 316      | 281 (88.9)                        |
|                                        |          |                                   | City and Hackney Teaching (5C3)     | 435      | 311 (71.5)                        |
|                                        |          |                                   | Havering (5A4)                      | 513      | 428 (83.4)                        |
|                                        |          |                                   | Newham (5C5)                        | 359      | 330 (91.9)                        |
|                                        |          |                                   | Redbridge (5NA)                     | 542      | 488 (90.0)                        |
|                                        |          |                                   | Tower Hamlets (5C4)                 | 368      | 342 (92.9)                        |
|                                        |          |                                   | Waltham Forest (5NC)                | 463      | 421 (90.9)                        |
| <b>North London</b>                    | 3,943    |                                   | Missing geographic data             | 3,943    | 0 (00.0)                          |
| <b>North Trent</b>                     | 5,849    | 5,816 (99.4)                      | Barnsley (5JE)                      | 802      | 795 (99.1)                        |
|                                        |          |                                   | Bassetlaw (Bassetlaw)               | 815      | 811 (99.5)                        |
|                                        |          |                                   | Doncaster (5N5)                     | 1,224    | 1,217 (99.4)                      |
|                                        |          |                                   | Sheffield (5N4)                     | 3,008    | 2,993 (99.5)                      |
| <b>North of England</b>                | 1,536    | 1,436 (93.5)                      | Middlesbrough (5KM)                 | 298      | 293 (98.3)                        |
|                                        |          |                                   | Newcastle (5D7)                     | 713      | 662 (92.8)                        |

| Cancer Network           | n             | with demographic data* (%) | PCT of residence                    | n     | with demographic data* (%) |
|--------------------------|---------------|----------------------------|-------------------------------------|-------|----------------------------|
|                          |               |                            | North Tyneside (5D8)                | 242   | 226 (93.4)                 |
|                          |               |                            | Northumberland Care Trust (TAC)     | 283   | 255 (90.1)                 |
| <b>South East London</b> | 2,397         | 2,165 (90.3)               | Bexley NHS Care Trust (TAK)         | 173   | 152 (87.9)                 |
|                          |               |                            | Lambeth (5LD)                       | 2,224 | 2,013 (90.5)               |
| <b>South West London</b> | 5,039         | 4,957 (98.4)               | Croydon (5K9)                       | 835   | 821 (98.3)                 |
|                          |               |                            | Kingston (5A5)                      | 837   | 829 (99.0)                 |
|                          |               |                            | Richmond and Twickenham (5M6)       | 847   | 835 (98.6)                 |
|                          |               |                            | Sutton and Merton (5M7)             | 1,669 | 1,640 (98.3)               |
|                          |               |                            | Wandsworth (5LG)                    | 851   | 832 (97.8)                 |
| <b>Sussex</b>            | 2,663         | 2,558 (96.1)               | Brighton & Hove City Teaching (5LQ) | 2,663 | 2,558 (96.1)               |
| <b>Three Counties</b>    | 1,032         | 973 (94.3)                 | Gloucestershire (5QH)               | 307   | 303 (98.7)                 |
|                          |               |                            | Herefordshire (5CN)                 | 305   | 286 (93.8)                 |
|                          |               |                            | Worcestershire (5PL)                | 420   | 384 (91.9)                 |
| <b>Yorkshire</b>         | 2,484         | 2,019 (81.3)               | Bradford & Airedale Teaching (5NY)  | 339   | 183 (54.0)                 |
|                          |               |                            | Kirklees (5N2)                      | 346   | 287 (83.8)                 |
|                          |               |                            | Leeds (5N1)                         | 272   | 265 (97.4)                 |
|                          |               |                            | North Yorkshire & York (5NV)        | 1,299 | 1,120 (86.2)               |
|                          |               |                            | Wakefield District (5N3)            | 228   | 164 (71.9)                 |
| Missing data             | 3,446         | 0 (00.0)                   | Missing postcode & PCT data         | 0     | 0 (00.0)                   |
| <b>Total</b>             | <b>49,270</b> |                            |                                     |       |                            |

(\*age group, gender, ethnic group (White/Black/South Asian/Other), income score of IMD deprivation)
